# Supplementary material for: Abl Kinase Inhibits the Engulfment of Apopotic Cells in Caenorhabditis elegans
Source: PubMed Central journal article supplement (PMC2672617; doi:10.1371/journal.pbio.1000099), 2009-04-28

*gex-3(zu196)*

*gex-3(zu196); abl-1(ok171)*

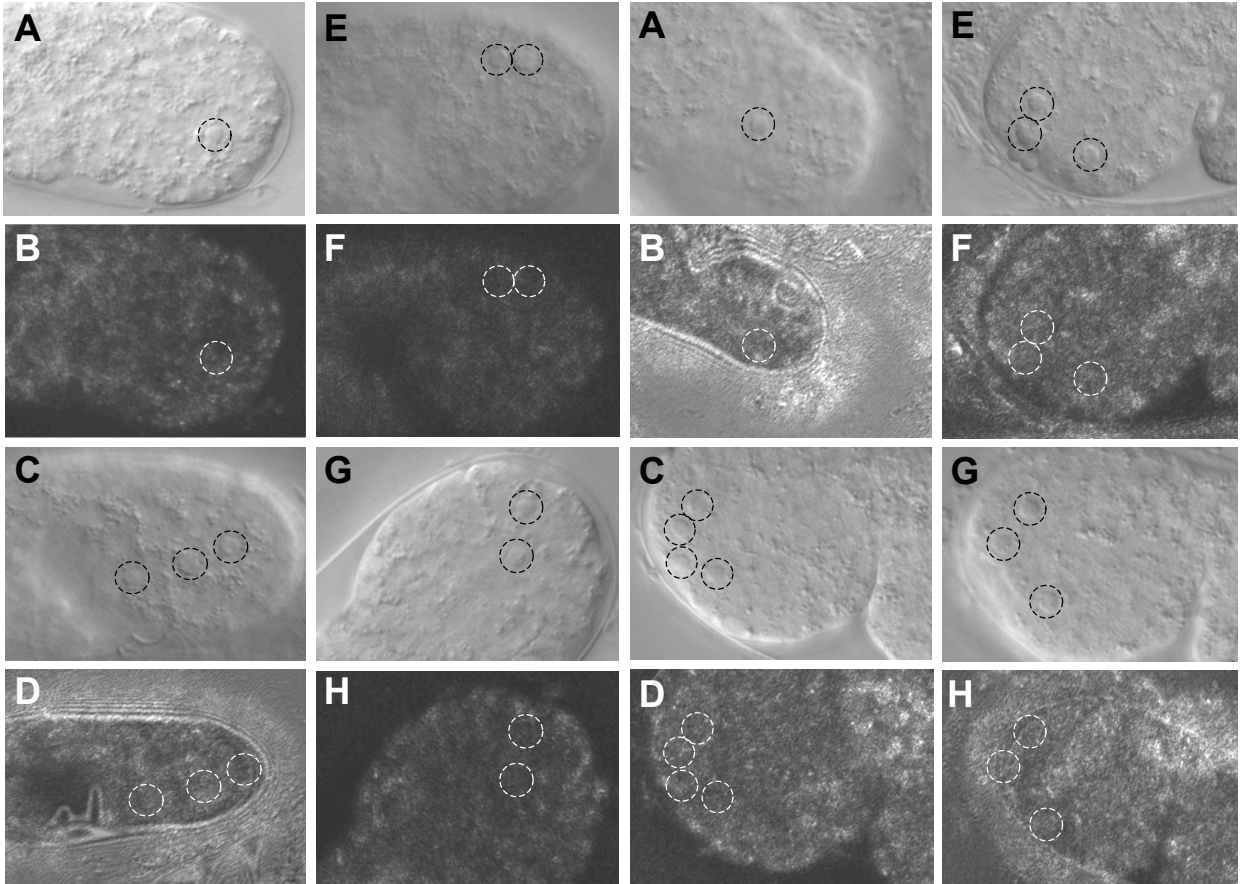

Supplement: pbio.1000099.sg001.pdf [file pbio.1000099.sg001.pdf]
